# Supplementary material for: Biomimetic-Functionalized, Tannic Acid-Templated Mesoporous Silica as a New Support for Immobilization of NHase
Source: MDPI journal article supplement (doi:10.3390/molecules22101597), 2017-09-25
Supplement: s1 [file s1]

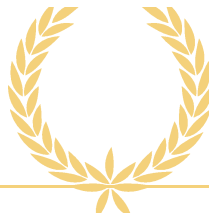

We certify that the following article

## Biomimetic functionalized tannic-acid-templated mesoporous silica as a new support for immobilization of NHase

Junkai Gao, Zijun Zhang, Yanjun Jiang, Yan Chen \*, Shufeng Gao

has undergone English language editing by MDPI. The text has been checked for correct use of grammar and common technical terms, and edited to a level suitable for reporting research in a scholarly journal.

MDPI uses experienced, native English speaking editors. Full details of the editing service can be found at

► [www.mdpi.com/authors/english](http://www.mdpi.com/authors/english).

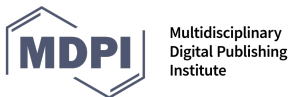

Basel, September 2017

Martyn Rittman, Ph.D.  
English Editing Manager
